# Supplementary material for: Transition from Schottky to ohmic contacts in the C31 and MoS2 van der Waals heterostructure
Source: Royal Society of Chemistry journal article supplement (doi:10.1039/d3cp02357e), 2023-01-01
Supplement: d3cp02357e1.pdf [file d3cp02357e1.pdf]

# Transition from Schottky to Ohmic Contacts in C31 and MoS2 van der Waals heterostructure

Lijun Xu, Guohui Zhan, Kun Luo, Fei Lu, Shengli Zhang and Zhenhua Wu\*

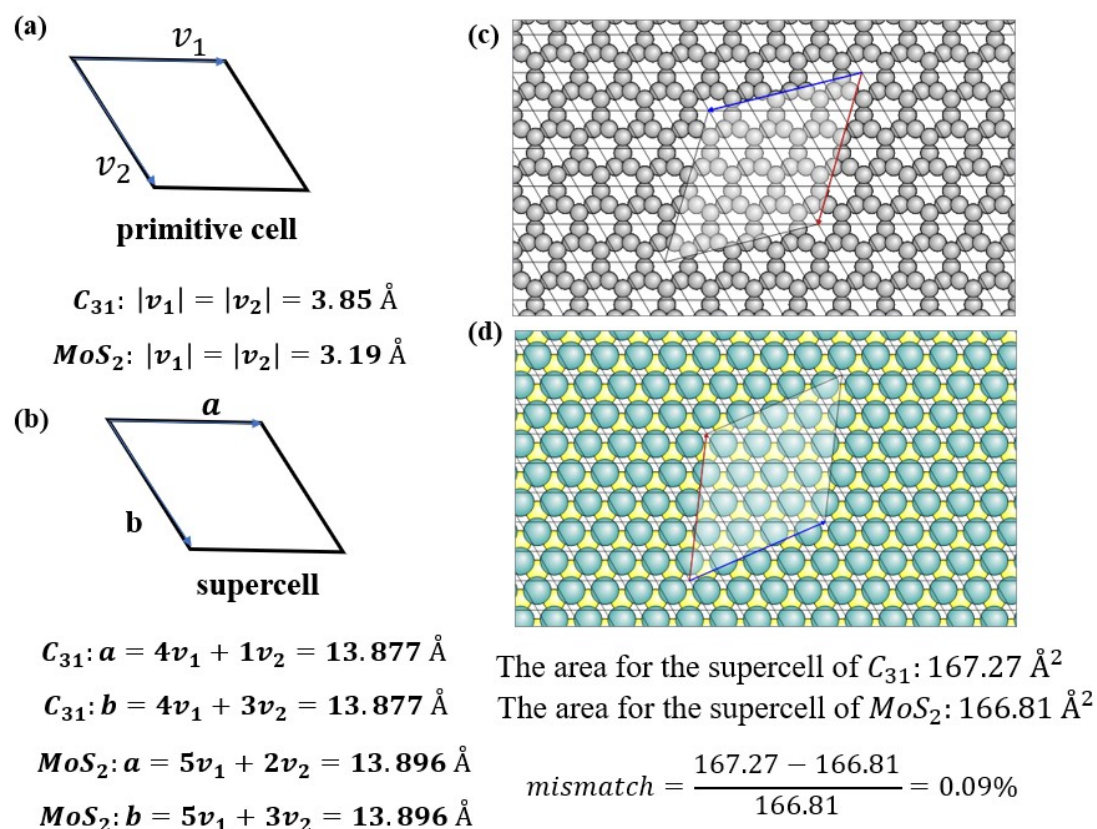

Fig. S1: The schematic diagram of primitive cell (a) and supercell (b). (c) and (d) are supercells of  $C_{31}$  and  $MoS_2$ .

Fig. S1(a) displays the fundamental arrangement and lattice dimensions of the primitive cell, while Fig. S1(b) depicts the process of constructing the supercell. The configurations of  $C_{31}$  and  $MoS_2$  can be observed in Figures S1(c) and S1(d), respectively. The  $MoS_2$  supercell remains unaltered, whereas all strain is applied to the  $C_{31}$  supercell. The mismatch is estimated by comparing the areas of their supercells, as demonstrated in Fig. S1(d).

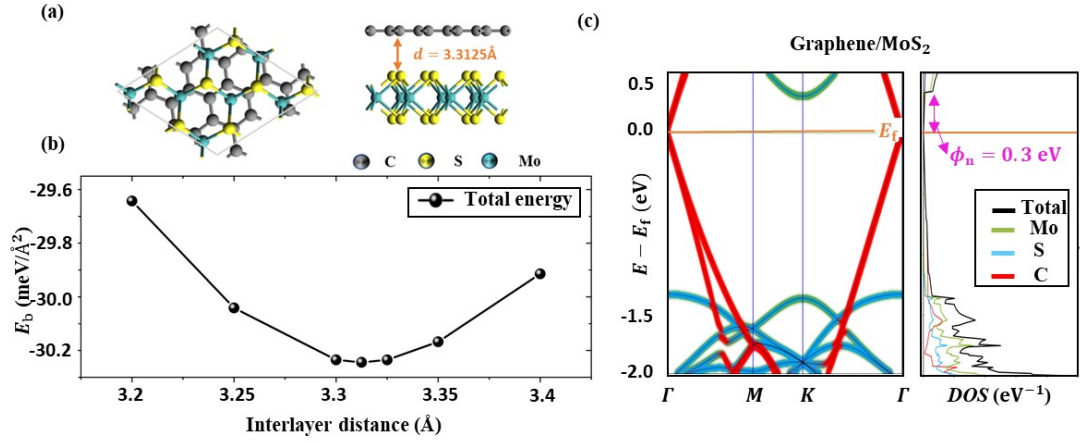

Fig. S2: (a) Top and side views of Graphene/MoS<sub>2</sub> heterostructure, and the interlayer distance is 3.3125 Å. The mismatch of Graphene/MoS<sub>2</sub> heterostructure is 0.18%. (b) The dependence of the binding energy on the interlayer distance, the minimum of binding energy is obtained at Interlayer distance = 3.3125 Å. (c) Weighted band structure and density of states (DOS) of heterostructure with the green blue and red colors indicating the contribution of molybdenum (Mo), carbon (C), and sulfur (S) elements, respectively.

Table: S1

The changes in lattice structure and Schottky barrier height as well as the bandgap of the semiconductor component of the Van der Waals heterostructures under different strain

| Strain | Lattice (Å) | n-type Schottky barrier (meV) | $E_g$ (MoS <sub>2</sub> ) (eV) |
|--------|-------------|-------------------------------|--------------------------------|
| -1%    | 13.759      | 96                            | 1.796                          |
| -0.5%  | 13.8285     | 50                            | 1.74                           |
| 0.0%   | 13.898      | 20                            | 1.64                           |
| 0.5%   | 13.9764     | 0                             | 1.5                            |
| 1%     | 14.037      | -18                           | 1.397                          |

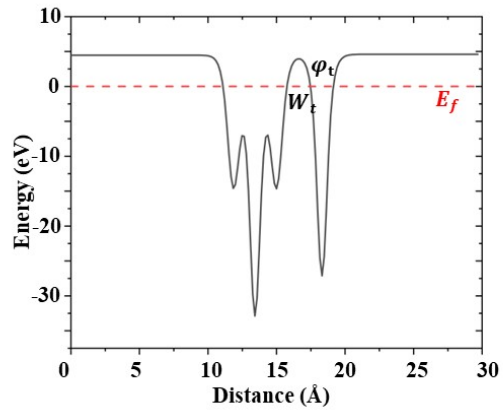

Fig. S3: (a) shows the electrostatic potential of the Graphene/MoS<sub>2</sub> heterostructure under the intrinsic condition, where  $\phi_t$  is the tunneling height and  $W_t$  is the tunneling width.
